# Supplementary material for: Effect of Baseline Symptom Manifestations on Retention in Care and Treatment among HIV-Infected Patients in Nigeria
Source: PubMed Central journal article supplement — J Int Assoc Provid AIDS Care. 2020 Feb 6;19:2325958220903575. doi: 10.1177/2325958220903575 (PMC7005974; doi:10.1177/2325958220903575), 2020-02-06
Supplement: Suppl_material.pdf [file Suppl_material.pdf]

## SUPPLEMENTARY QUESTIONS

- What do we already know about this topic?

Symptom management is an important component of HIV care and play an important role in how people living with HIV engage with care and treatment

- How does your research contribute to the field?

This research advances knowledge about HIV care by investigating the relationship between symptom patterns among people living with HIV and retention in care and treatment

- What are your research's implications toward theory, practice, or policy?

To ensure maximum engagement with care, HIV care-providers and health systems need to place equal emphasis on both symptom assessment/management and anti-retroviral therapy.
